# Supplementary material
Source: HighWire-hosted journal article supplement (https://bmjopen.bmj.com/content/10/9/e036959)
Supplement: inline-supplementary-material-3 [file inline-supplementary-material-3.pdf]

Supplementary Table 2: Validity tested and domains assessed in instruments to measure postoperative recovery

| Tool                                           | Validity assessed                                              | Cognitive | Nociceptive/pain | Emotive | Sleep | Activity of daily living | Physiologic | Reasons not chosen    |
|------------------------------------------------|----------------------------------------------------------------|-----------|------------------|---------|-------|--------------------------|-------------|-----------------------|
| Postdischarge Surgical Recovery (PSR)          | Construct, convergent validity                                 |           |                  | Y       |       | Y                        |             | Low number of domains |
| Quality of Recovery (QoR)                      | Convergent, construct, test-retest reliability, responsiveness |           | Y                | Y       | Y     | Y                        | Y           | -                     |
| Surgical Recovery Index (SRI)                  | Convergent validity                                            |           | Y                |         |       | Y                        |             | Low number of domains |
| Functional Recovery Index (FRI)                | Discriminant validity                                          |           | Y                |         |       | Y                        |             | Low number of domains |
| Postoperative Quality of Recovery Score (PQRS) | Face validity                                                  | Y         | Y                | Y       |       | Y                        | Y           | Requires administer   |
| Surgical Recovery Scale (SRS)                  | None                                                           |           |                  | Y       |       | Y                        |             | Low number of domains |
